# Supplementary material for: Lattice engineering through Al-substitution leads to enhanced magneto-optical properties of Tb3(AlxGa1−x)5O12 single crystals
Source: Royal Society of Chemistry journal article supplement (doi:10.1039/d3tc04069k), 2024-01-01
Supplement: d3tc04069k1.pdf [file d3tc04069k1.pdf]

## Supporting information

### Lattice engineering through Al-substitution leads to enhanced magneto-optical properties of $\text{Tb}_3(\text{Al}, \text{Ga})_5\text{O}_{12}$ single crystals

*Xianhui Xin, Yuankai Hao, Xianxian Yang, Zhen Zhang, Xiuwei Fu\*, Zhitai Jia\*, and Xutang Tao*

<sup>1</sup> State Key Laboratory of Crystal Materials, Shandong University, Jinan, Shandong 250100, China

<sup>2</sup> Shandong Research Institute of Industrial Technology, Jinan, Shandong 250100, China

\* Corresponding author: [fxw@sdu.edu.cn](mailto:fxw@sdu.edu.cn), [z.jia@sdu.edu.cn](mailto:z.jia@sdu.edu.cn)

Table S1. EDS results of TAGG75 crystal.

Figure S1. Element mapping images of TAGG75 crystal.

Table S1.EDS results of TAGG75 crystal.

| Element | Wt%   |
|---------|-------|
| Tb      | 60.29 |
| Al      | 12.31 |
| Ga      | 8.02  |
| O       | 19.38 |

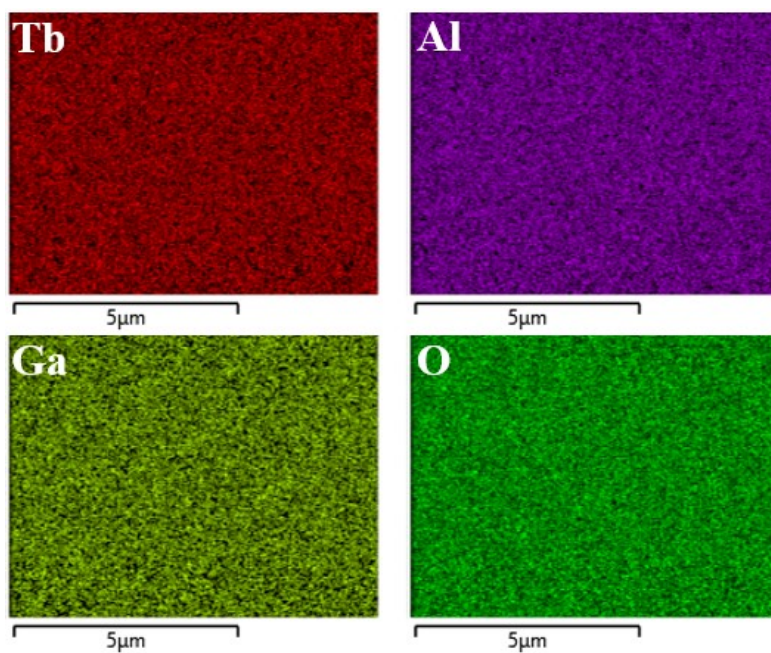

Figure S1. Element mapping images of TAGG75 crystal.
